1 **Manuscript Title**

2 Minimally-invasive nasal sampling in children offers accurate pneumococcal  
3 colonization detection

4 **Authors' full names**

5 Elissavet Nikolaou,<sup>1</sup> Annie Blizard,<sup>1</sup> Sherin Pojar,<sup>1</sup> Elena Mitsi,<sup>1</sup> Esther L.  
6 German,<sup>1</sup> Jesús Reiné,<sup>1</sup> Helen Hill,<sup>2</sup> Paul S. McNamara,<sup>3</sup> Andrea M. Collins,<sup>1</sup>  
7 Daniela M. Ferreira,<sup>1\*</sup> and Simon P. Jochems<sup>1,4\*</sup>

8 **Affiliations**

9 <sup>1</sup>Department of Clinical Sciences, Liverpool School of Tropical Medicine,  
10 Liverpool, UK

11 <sup>2</sup>Department of Respiratory Medicine, Royal Liverpool University Hospital,  
12 Liverpool, UK

13 <sup>3</sup>Department of Child Health, Alder Hey Children's NHS Foundation Trust  
14 Hospital, Liverpool, United Kingdom

15 <sup>4</sup>Department of Parasitology, Leiden University Medical Center, Leiden,  
16 Netherlands

17 \*Joint last authors

18 **Keywords:** Pneumococcus, Children, Synthetic absorptive matrices,  
19 Colonization, qPCR

20 **Running Title**

21 Pneumococcal colonization detection with SAM

22 **Correspondence**

23 Simon Pieter Jochems, Leiden University Medical Center, Albinusdreef 2, 2333  
24 ZA, Leiden, Netherlands, +31 (0)71 526 1404, S.P.Jochems@lumc.nl

25 **Alternative correspondence**

26 Elissavet Nikolaou, Liverpool School of Tropical Medicine, 1 Daulby Street,  
27 Liverpool, UK, L7 8XZ, +44 (0)151 702 9346, Elissavet.Nikolaou@lstm.ac.uk

28

29        **Abstract**

30        Nasopharyngeal colonization of potential respiratory pathogens such as  
31        *Streptococcus pneumoniae* is the major source of transmission and precursor of  
32        invasive disease. Swabbing deeply the nasopharynx, which is currently  
33        recommended by WHO, provides accurate pneumococcal detection but is  
34        unpleasant. We showed that nasal lining fluid filter strips offer equal detection  
35        sensitivity.

36

37

38

39

40

41

42

43

44

45

46

47

48

49

50

51

52

53

54

55

56 *Streptococcus pneumoniae* (Spn, pneumococcus), which naturally inhabits the  
57 nasopharynx of 40-95% of infants without causing disease [1] is one of the most  
58 frequent causes of bacterial infection in children. This bacterium accounts for  
59 about 38% of childhood deaths caused by pneumonia [2], which is the leading  
60 cause of death in children under 5 years worldwide [3]. Therefore, detection of  
61 pneumococcal colonization is of a great importance, as it is the primary reservoir  
62 for transmission and prerequisite of invasive disease.

63

64 There are a variety of sampling techniques for detecting nasopharyngeal  
65 colonization with different detection sensitivities. In adults, nasopharyngeal swab  
66 (NPS) and nasopharyngeal wash (NPW) cultures have been shown to detect  
67 higher rates of *S. pneumoniae* colonization than oropharyngeal swabs (OPS) [4].  
68 However, sampling in children is challenging as swabs and aspirates can cause  
69 significant discomfort. Saliva sampling, which is painless to collect, has been  
70 successfully used to detect pneumococcus in children instead of NPS or OPS  
71 [5], however due to its polymicrobial nature might give false-positive results when  
72 using molecular methods [6].

73

74 On the other hand, sampling of nasal lining fluid using synthetic absorptive  
75 matrices (SAM) does not cause discomfort and has been used to detect  
76 respiratory syncytial virus (RSV) infection in a paediatric intensive care unit  
77 setting [7]. Whether such minimally-invasive samples could detect bacteria,  
78 including pneumococcus, has not been assessed yet, and there is a lack of  
79 evidence on whether nasal sampling is as sensitive as nasopharyngeal sampling  
80 for detection of carriage. The World Health Organisation (WHO) thus  
81 recommends NPS for pneumococcal colonization detection in children and both  
82 NPS and OPS in adults [8].

83

84 Recently, limitations of detection in conventional microbiology have led to the  
85 increased employment of PCR-based methods. The latter detects  
86 pneumococcus at low densities and thus offers high sensitivity for colonization  
87 detection. For detecting pneumococcal DNA in clinical samples, WHO  
88 recommends the use of quantitative PCR (qPCR) targeting the well-conserved  
89 autolysin-encoding gene *lytA* [8].

90

91 The present study aimed to test whether SAM can be used to accurately assess  
92 pneumococcal colonization by comparing the sensitivity (colonization rates and  
93 density) for detecting pneumococcal colonization in children between SAM and  
94 NPS using *lytA* qPCR. We also compared the results obtained with NPS  
95 cultures.

96

## 97 **Methods**

### 98 ***Study design and ethics statement***

99 SAM (Nasosorption™, Hunt Developments) and NPS (Transwab, Sigma)  
100 samples were collected from 49 children aged 1-5 years that were under general  
101 anaesthesia for unrelated reasons. Samples were collected after onset of  
102 general anaesthesia but prior to start of their planned procedure (dental  
103 extraction, MRI, orthopaedic or plastic surgery). To assess pneumococcal  
104 colonization, NPS samples were placed in skim milk, tryptone, glucose, and  
105 glycerine (STGG) medium and cultured on Columbia blood agar supplemented  
106 with 5% horse blood (PB0122A, Oxoid/Thermo Scientific) and 80µl gentamycin  
107 1mg/mL (G1264-250mg, Sigma-Aldrich co Ltd). Plates were incubated overnight  
108 at 37°C and 5% CO<sub>2</sub>. Pneumococcal serotype was confirmed by latex  
109 agglutination (Statens Serum Institute, Copenhagen, Denmark). SAM samples  
110 and the remainder NPS samples were frozen at -80°C to be used for DNA  
111 extraction and qPCR.

112 Informed consent was obtained from all children's parents after a thorough  
113 explanation of the study. This trial was approved by The National Health Service  
114 Research and Ethics Committee (REC) (17/NW/0663) and was sponsored by  
115 the Liverpool School of Tropical Medicine. All experiments were adapted to the  
116 relevant regulatory standards (Human Tissue Act, 2004).

117

### 118 ***Pneumococcal DNA extraction from SAM and NPS samples***

119 On the day of the extraction, SAM samples were thawed for 30 minutes on ice.  
120 100µl of Luminex assay diluent (Thermofisher, Basingstoke, UK) was added to  
121 the filter and centrifuged at 1,503xg for 10 minutes at 4°C. After centrifugation,  
122 the eluted liquid was moved to a clean Eppendorf tube and centrifuged at  
123 16,000xg for 10 minutes at 4°C. The supernatant was removed, and the pellets  
124 were used for DNA extraction. DNA extraction was performed using the Agowa  
125 Mag mini DNA extraction kit (LGC genomics, Berlin, Germany) and  
126 manufacturer's instructions were followed. For NPS samples, 200ul raw material  
127 were defrosted and DNA was extracted using the same procedure.

128

### 129 ***Quantification of pneumococcal DNA in SAM and NPS samples by *lytA**** 130 ***qPCR***

131 Colonization density in both SAM and NPS samples was determined by qPCR  
132 targeting the *lytA* gene (10) using the Mx3005P system (Agilent Technologies,  
133 Cheadle, UK). The sequences of the primers and probes used are: *lytA* forward  
134 primer: 5'-ACG-CAA-TCT-AGC-AGA-TGA-AGC-A-3'; *lytA* reverse primer 5'-  
135 TCG-TGC-GTT-TTA-ATT-CCA-GCT-3'; *lytA* probe: 5'-(FAM)-TGC-CGA-AAA-  
136 CGC-TTG-ATA-CAG-GGA-G-(BHQ-1)-3'. For the standard curve, pneumococcal  
137 DNA was extracted using the QIAamp DNA mini kit (Qiagen, Hilden, Germany).  
138 Samples were considered positive if two or all triplicates yielded a  $C_T < 40$

139 cycles. Multiple experiment analysis was performed, and cross experiment  
140 threshold was calculated by using interrun calibrators.

141

### 142 ***Statistical Analysis***

143 Statistical analysis was performed by GraphPad Prism version 5.0 (California,  
144 USA). Data were log-transformed where appropriate. To distinguish between  
145 parametric and non-parametric data a Kolmogorov-Smirnoff normality test was  
146 performed. To quantify association between groups, the Pearson correlation test  
147 was used for parametric groups. Differences were considered significant if  $P \leq$   
148 0.05.

149

### 150 **Results**

#### 151 ***Both SAM and NPS qPCR detect equal pneumococcal colonization rates*** 152 ***higher than NPS cultured samples***

153 SAM and NPS samples were collected from 49/50 children enrolled in the study  
154 and used in this analysis. Using culture of NPS, 22/49 (44.90%) children were  
155 positive for Spn. Serotypes/groups identified were: SPN15 (7), SPN23 (4), SPN  
156 non-vaccine type (NVT) group G (3), SPN11 (2), SPN19 (2), SPN3, SPN10, SPN  
157 NVT group E and SPN NVT group I. All culture-positive children were also  
158 positive by molecular detection from NPS and SAM. Another 4 children were  
159 positive for Spn by *lytA* qPCR from both SAM and NPS. Moreover, another 5  
160 children were positive by *lytA* qPCR from either SAM or NPS each. Thus, NPS  
161 and SAM *lytA* qPCR detected 31/49 (63.27%) children positive for Spn and  
162 agreed in 26/31 (83.87%) of them. In total, the number of positive colonised  
163 children detected by qPCR in both SAM and NPS samples was 1.4-fold higher  
164 than those detected in NPS cultured samples.

165

166 ***Pneumococcal colonization densities measured by all three methods***  
167 ***correlate significantly to each other***

168 There was a significant correlation between bacterial load determined by SAM  
169 *lytA* qPCR, NPS *lytA* qPCR and NPS cultured ( $P < 0.0001$ , Figure 1). In the  
170 majority of cases, pneumococcal densities measured by NPS qPCR were higher  
171 than those detected by NPS cultured (19/22, 86.36%). Four samples were  
172 positive by both SAM and NPS qPCR but not NPS cultured, with densities  
173 ranging between 10-176 DNA copies from SAM and 31-149 DNA copies from  
174 NPS. Another 5 samples were positive only by SAM *lytA* qPCR with densities 10-  
175 151 DNA copies. Another 5 were positive only by NPS *lytA* qPCR with densities  
176 60-205 Spn DNA copies. Pneumococcal densities calculated by NPS qPCR  
177 were higher than those detected by SAM qPCR (24/26, 92.31%).

178

179 **Discussion**

180 Our results showed that SAM can be used as an alternative method to the  
181 current gold standard NPS [8] for pneumococcal detection in children with equal  
182 detection sensitivity. NPS sampling is associated with substantial discomfort [4].  
183 SAM sampling targeting the anterior nares is a less invasive technique than NPS  
184 sampling, where a sample is collected from the nasopharynx. We have  
185 previously demonstrated that SAM sampling has low levels of discomfort, pain  
186 and lacrimation in adults [9].

187

188 The number of volunteers that were identified as Spn colonized by *lytA* qPCR  
189 (colonization rate) was higher than the number found by classical culture, as was  
190 expected. SAM qPCR detected equal numbers of Spn positive children as NPS  
191 qPCR (31/49, 63.27%) and agreed in 26/31 (83.87%) of cases, demonstrating  
192 that SAM sampling is a sensitive and specific alternative to NPS for  
193 pneumococcal detection in children. The children that were identified as carriers

194 from only NPS or SAM were predominantly low density colonized and the  
195 discrepancy between the two sites might thus be stochastic. However, it is not  
196 impossible that differences between the two sites (anterior part of the nose and  
197 nasopharynx) exist in terms of microbiota composition. Additionally, we observed  
198 that pneumococcal densities in Spn positive volunteers detected by NPS qPCR  
199 are higher than those detected by SAM qPCR although this did not lead to  
200 differences in numbers of identified carriers. It is possible that swabbing collects  
201 more sample than absorption by SAM, however this did not affect sensitivity of  
202 Spn detection.

203

204 Previously, using the Experimental Human Pneumococcal Challenge (EHPC)  
205 model of infection in which healthy adults were challenged with 6B type  
206 pneumococcus, detection of pneumococcus in the nose of adults using SAM  
207 once Spn colonisation was established was low [10]. At day 2 and 6 after 6B  
208 exposure, only 1/9 (11.1%) and 1/7 (14%) Spn positive adults (carriers by  
209 classical culture of nasal washes) was found to be Spn positive by SAM qPCR.  
210 Possible explanations for this discrepancy are: differences in anatomy,  
211 physiology and nasal/oral microbiome between both groups and the possible  
212 change of colonization niche from the nasopharynx to oropharynx in adults [6].  
213 The increased presence of pneumococcus in the anterior parts of the nose in  
214 children compared to adults could offer an explanation as to why children are  
215 transmitting more than adults.

216

217 In conclusion, our findings support that SAM sampling is a robust method for  
218 accurate detection of pneumococcus in children that could be employed during  
219 clinical trials and large epidemiological studies.

220

221



222 **Notes**

223 ***Funding***

224 This work was supported by the LSTM Director Catalyst Fund [awarded to S.  
225 Jochems], which was funded by the Wellcome Trust Institutional Strategic  
226 Support Fund 3 [204806/Z/16/Z] and the Liverpool School of Tropical Medicine  
227 Internal Funding. This work was also supported by the Bill and Melinda Gates  
228 Foundation (OPP1117728 awarded to D. Ferreira) and the Medical Research  
229 Council [MR/K01188X/1 awarded to S. Gordon]. The LSTM Respiratory Infection  
230 Group acknowledges the support of the National Institute for Health Research  
231 Clinical Research Network (NIHR CRN). The funders had no role in study  
232 design, data collection and analysis, decision to publish, or preparation of the  
233 manuscript.

234

235 ***Acknowledgements***

236 We would like to thank all children for their participation and their parents for  
237 providing informed consent. Also, we would like to thank the Liverpool Alder Hey  
238 Children Hospital for supporting this research.

239

240 ***Potential conflicts of interest***

241 The authors declare no competing interests.

242

243 **References**

- 244 1. Goldblatt D, Hussain M, Andrews N, et al. Antibody responses to  
245 nasopharyngeal colonization of *Streptococcus pneumoniae* in adults: A  
246 longitudinal household study. J Infect Dis, **2005**; 192: 387-393.
- 247 2. Rudan I, O'Brien KL, Nair H, et al. Epidemiology and etiology of childhood  
248 pneumonia in 2010: estimate of incidence, severe morbidity, mortality, underlying

- 249 risk factors and causative pathogens for 192 countries. *J Glob Health*, **2013**; 3:  
250 010401.
- 251 3. Liu L, Johnson HL, Cousens S, et al. Global, regional, and national causes of  
252 child mortality: an updated systematic analysis for 2010 with time trends since  
253 2000. *The Lancet*, **2012**; 379: 2151-2161.
- 254 4. Gritzfeld JF, Roberts P, Roche L, et al. Comparison between nasopharyngeal  
255 swab and nasal wash, using culture and PCR, in the detection of potential  
256 respiratory pathogens. *BMC Research Notes*, **2011**; 4: 122.
- 257 5. Wyllie AL, Chu MLJN, Schellens MHB, et al. *Streptococcus pneumoniae* in  
258 saliva of Dutch primary school children. *PLOS One*, **2014**; 9: e102045.
- 259 6. Wyllie AL, Rümke LW, Arp K, et al. Molecular surveillance on *Streptococcus*  
260 *pneumoniae* carriage in non-elderly adults; little evidence for pneumococcal  
261 circulation independent from the reservoir in children. *Sci Rep*, **2016**; 6: e34888.
- 262 7. Thwaites RS, Ito K, Chingono, JMS, et al. Nasosorption as a minimally  
263 invasive sampling procedure: Mucosal viral load and inflammation in primary  
264 RSV Bronchiolitis. *J Infect Dis*, **2017**; 215: 1240-1244.
- 265 8. Satzke C, Turner P, Virolainen-Julkunen A, et al. Standard method for  
266 detecting upper respiratory carriage of *Streptococcus pneumoniae*: updated  
267 recommendations from the World Health Organization Pneumococcal Carriage  
268 Working Group. *Vaccine*, **2013**; 32: 165-179.
- 269 9. Jochems SP, Piddock K, Rylance J, et al. Novel analysis of immune cells from  
270 nasal microbiopsy demonstrated reliable, reproducible data for immune  
271 populations, and superior cytokine detection compared to nasal wash. *PLOS*  
272 *One*, **2017**; 12: e0169805.
- 273 10. Nikolaou E, Jochems SP, Mitsi E, et al. Experimental human challenge  
274 reveals distinct mechanisms of acquisition or protection against pneumococcal  
275 colonization. *bioRxiv*, **2018**; e459495.
- 276

277 **Figure Legends**

278 **Figure 1: Correlation of colonization densities between detection methods**

279 **A. SAM qPCR vs NPS cultured, B. NPS qPCR vs NPS cultured, C. SAM**

280 **qPCR vs NPS qPCR.** Points represent children positive for Spn and a linear

281 regression line is added. Data was log transformed. A Pearson test was used to

282 measure correlation between the methods of pneumococcal detection. Venn

283 diagrams illustrate Spn positive children detected by each method; **A.** 22 children

284 were positive for Spn by both SAM qPCR and NPS cultured ( $r=0.7692$ ,

285  $****P<0.0001$ ). In total, SAM qPCR detected 31 Spn positive children (Venn

286 diagram). **B.** 22 children were positive for Spn by both NPS qPCR and NPS

287 cultured ( $r=0.8806$ ,  $****P<0.0001$ ). In total, NPS qPCR detected 31 Spn positive

288 children (Venn diagram), **C.** 26 children were positive for Spn by both SAM

289 qPCR and NPS cultured ( $r=0.8143$ ,  $****P<0.0001$ ). 5 children were Spn positive

290 by *lytA* qPCR from either SAM or NPS each (Venn diagram).

A.

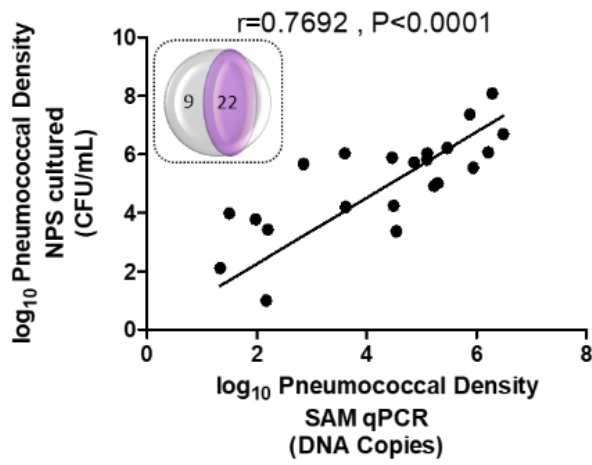

B.

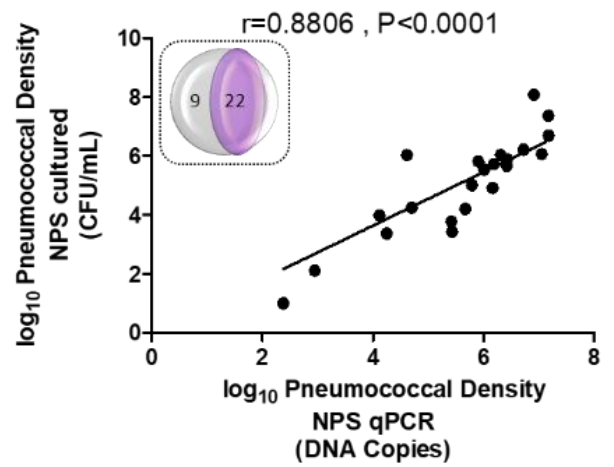

C.

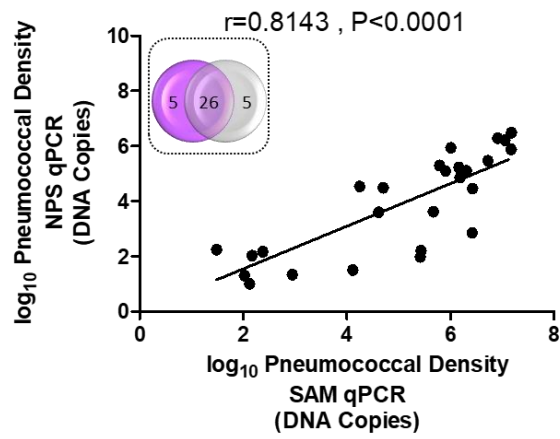

Source: https://www.biorxiv.org/content/10.1101/573196v1.full.pdf
